# Supplementary material for: A Cross-Sectional Study to Assess the Frequency and Risk Factors Associated with Cesarean Section in Southern Punjab, Pakistan
Source: Int J Environ Res Public Health. 2021 Aug 21;18(16):8812. doi: 10.3390/ijerph18168812 (PMC8391541; doi:10.3390/ijerph18168812)
Supplement: Supplementary file 1 [file ijerph-18-08812-s001.zip › ijerph-1282947-supplementary.pdf]

## Supplementary information

### A cross-sectional study to assess the frequency and risk factors associated with cesarean section in Southern Punjab, Pakistan

Muhammad Fawad Rasool<sup>1\*</sup>, Saira Akhtar<sup>1</sup>, Iltaf Hussain<sup>1</sup>, Abdul Majeed<sup>1</sup>, Imran Imran<sup>2</sup>, Hamid Saeed<sup>3</sup>, Muqarrab Akbar<sup>4</sup>, Muhammad Omer Chaudhry<sup>5</sup>, Anees Ur Rehman<sup>1</sup>, Waseem Ashraf<sup>2</sup>, Faleh Alqahtani<sup>6\*</sup>, Hussain Alqhtani<sup>7</sup>

**Supplementary Table S1. The study tool**

| Socio-demographic factors                                                | Responses             |                         |                                                            |                          |                   |                              |                         |       |
|--------------------------------------------------------------------------|-----------------------|-------------------------|------------------------------------------------------------|--------------------------|-------------------|------------------------------|-------------------------|-------|
| Age group (years)                                                        | 16-25                 |                         |                                                            | 26-35                    |                   |                              | >36                     |       |
| Gestational age (weeks)                                                  | Preterm (37 or below) |                         | Full-term (39–40)                                          |                          | Late-term (41)    |                              | Post-term (40 or above) |       |
| Education                                                                | Primary               |                         |                                                            | Secondary                |                   | Tertiary                     |                         |       |
| Place of Residency                                                       | Urban                 |                         |                                                            | Rural                    |                   |                              |                         |       |
| Societal life                                                            | Living alone          |                         |                                                            | Living with family       |                   |                              |                         |       |
| Physical Activity                                                        | High activity         | Moderate activity       |                                                            |                          | Low activity      |                              |                         |       |
| Hookah user                                                              | Yes                   |                         |                                                            | No                       |                   |                              |                         |       |
| Parity (number of births given after 20 weeks of gestation)              |                       | Nulli-parity (0)        |                                                            | Low multi-parity (1-3)   |                   | Grand multi-parity (4-8)     |                         |       |
| Gravidity (total number of confirmed pregnancies, regardless of outcome) |                       |                         | Nulli-gravida (0)                                          |                          | Primi-gravida (1) |                              | Multi-gravida (>1)      |       |
| Obstetric variables                                                      |                       |                         |                                                            |                          |                   |                              |                         |       |
| Pregnancy complications                                                  |                       | Hypertension            |                                                            | Pre-eclampsia/ eclampsia | Thyroid problem   | Significant vaginal bleeding |                         | Other |
| Indication for cesarean section                                          |                       |                         |                                                            |                          |                   |                              |                         |       |
| Dystocia (obstructed labor, long labor, failed induction of labor)       | Breech presentation   | Transverse presentation | Fetal distress (abnormal fetal heart rate, cord prolapsed) | Placenta                 | praevia/ accreta  | other                        | Past cesarean history   |       |

| <b>Knowledge about cesarean section</b>                                      |                  |    |            |
|------------------------------------------------------------------------------|------------------|----|------------|
| <b>Question items</b>                                                        | <b>Responses</b> |    |            |
| Have you ever heard about CS?                                                | Yes              | No | Don't know |
| Do you think you have enough knowledge about CS?                             | Yes              | No | Don't know |
| Do you know vaginal delivery after CS was feasible?                          | Yes              | No | Don't know |
| Do you know that blood could be needed during or after the operation?        | Yes              | No | Don't know |
| Do you consider that CS is dangerous?                                        | Yes              | No | Don't know |
| Do you agree CS will cause death??                                           | Yes              | No | Don't know |
| Do you agree vaginal birth will cause death?                                 | Yes              | No | Don't know |
| Do you prefer CS on doctor's advice?                                         | Yes              | No | Don't know |
| Do you agree that vaginal birth can cause pain?                              | Yes              | No | Don't know |
| Do you agree CS must be discouraged because of post-surgical pain?           | Yes              | No | Don't know |
| Do you believe CS is the safest way to save the lives of mothers and babies? | Yes              | No | Don't know |
| Would you believe a cesarean could lead to infertility?                      | Yes              | No | Don't know |
| Do you agree that CS is related to previous CS?                              | Yes              | No | Don't know |
